# Supplementary material
Source: HighWire-hosted journal article supplement (doi:10.1101/rna.079983.124)
Supplement: Supplemental_Material.docx [file Supplemental_Material.docx]

| **3′X RNA** | **calculated** *∆∆Gº* **(a-b) [*kcal/mol*]** | **experimental** *∆∆Gº* **(a-b) [*kcal/mol*]** |
| --- | --- | --- |
| **WT** | (-44.1) – (-42.1) = -2.0 | *–* |
| **3′X55** | (-20.2) - (-13.2) = -7.0 | -0.6 |
| **3′X49** | (-5.5) – (-12.4) = +6.9 | +0.7 |

**Table S1: Folding free energy differences between the two conformations of 3′X.** Folding free energy values for both secondary structures of the various **3′X** RNAs were calculated as described in the **MATERIALS AND METHODS** section. The difference between these values (***ΔΔG***) reflects the relative stability of the two different secondary structures. Experimental values are calculated using the relative abundance values derived from single-molecule FRET measurements at a temperature of 298.15 *K*.

| RNA 1 | 5′—GGUGG CUCCA UC/iAmC6T/UA GCCCU AGUCA CGGC—3′ |
| --- | --- |
| RNA 2 | 5′—/5Phos/UAGCU GUGAA /iUniAmM/AGGU CCGUG AGCCG CU—3′ |
| RNA 3 | 5′—/5Phos/UAGCU GUGAA /iUniAmM/AGGU CCGUG A—3′ |
| DNA splint | 5′—AGCGG CTCAC GGACC TTTCA CAGCT AGCCG TGACT AGGGC TAAGA TGGAG CCACC—3′ |
| 3′X55 | 5′—GGUGG CUCCA UC/iAmC6T/UA GCCCU AGUCA CGGCU AGCUG UGAA/iUniAmM/ AGGUC CGUGA GCCGC U—3′ |
| 3′X49 | 5′—GGUGG CUCCA UC/iAmC6T/UA GCCCU AGUCA CGGCU AGCUG UGAA/iUniAmM/ AGGUC CGUGA—3′ |

**Table S2:** **Names and sequences of oligonucleotide fragments and RNA constructs.** The sequences and modifications of the various RNA and DNA oligonucleotides are reported in the first 4 sequences. The last two are the sequences of our labeled, ligated oligo products.

**Figure S1**: **Monomeric status of 3′X55 and 3′X49. (a)** 3′X55 and 3′X49 were measured under baseline experimental conditions with the monochromatic laser diodes set to operate in the pulsed mode at a frequency of 20 MHz, resulting in a pulsed interleaved excitation configuration that allows for accurate measurements of the sub-millisecond translational diffusion. Here we can see that the resulting histograms are experimentally indistinguishable from those generated using the ALEX configuration outlined in the main text(**fig 4a**). Notably, the mean diffusion times (τD) of both samples are quite similar suggesting that both species have roughly the same hydrodynamic radius, and thus oligomeric status, despite adopting different conformations. **(b)** Under baseline experimental conditions, the transfer efficiency histograms of 3′X55 refolded (incubated at 95 °C for 10 minutes and allowed to cool back down to room temperature for an hour on the heating block) at 100 pM are experimentally indistinguishable from those generated when 3′X55 is refolded at 10 nM (see **MATERIALS AND METHODS**).

**Figure S2:** **Consensus and reference sequences for 3′X**. The only difference between the two is at position 55, where the reference sequence has a U, which occurs in 19% of all sequences, whereas the consensus sequence contains an A, which appears in 81% of all sequences.

**Figure S3**: **RNA labeling chemistry.** Amino-reactive N-hydroxysuccinimide functionalized Cy3B (donor; green) and CF660R (acceptor; red) fluorophores are conjugated via nucleophilic substitution reaction to the RNA oligos utilizing primary amines found on either residue 13 or a synthetic amino-modified linker located between residues 39 and 40.

**Figure S4: Stoichiometry-transfer efficiency scatter plot.** The and values for all bursts can be displayed on a scatter plot. This data can be projected onto each of the two axes to better assess the distribution of fluorophore stoichiometries and transfer efficiencies in the sample. Here we see that the vast majority (96%) of our RNAs are FRET-active and that they reside in two different populations.

**Figure S5:** **Recurrence analysis of single particles (RASP) to determine fitted parameters.** **(a)** RASP can be used to calculate the probability (*psame*) that the same molecule was responsible for proximal bursts within a specified time frame (𝜏). Under our single molecule conditions, if two high-quality bursts occur with one or fewer intervening bins (i.e., 𝜏 = 2 ms), we can say with roughly 88% confidence that they both arose from the same molecules. **(b)** With this in mind, RASP can be used to select all bursts from an unbiased transfer efficiency histogram (*top*) from within a range of transfer efficiencies in addition to any other bursts that occurred within 2 ms. Doing so results in transfer efficiency histograms that are biased towards either the intermediate (*middle*) or high transfer efficiency population (*bottom*). A global analysis of these three histograms is used to get robust estimates for the fitted parameters associated with the two partially overlapping populations.
